# Supplementary material for: Adiponectin-leptin Ratio is a Functional Biomarker of Adipose Tissue Inflammation
Source: PubMed Central journal article supplement (PMC6412349; doi:10.3390/nu11020454), 2019-02-22
Supplement: nutrients-11-00454-s001.pdf [file nutrients-11-00454-s001.pdf]

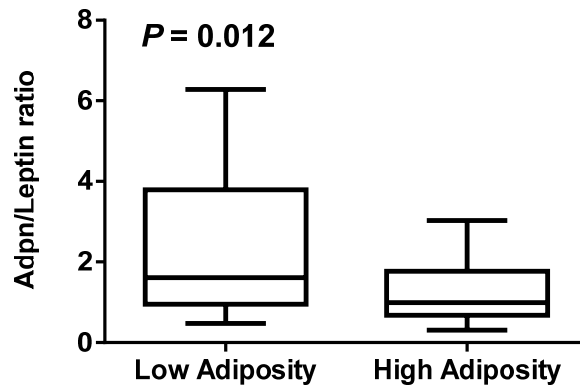

**Figure S1.** Adpn/Lep ratio according to body adiposity in the 83 lean subjects (low adiposity, n=42; high SAA n=41). Statistical differences were analyzed by two-tailed unpaired Student's t test.

**Table S1.** Analysis of the correlation between several anthropometric and cardiometabolic variables and the markers of adipose tissue dysfunction Adpn/Lep ratio and VAI after adjustment by BMI.

| Variable            | Adpn/Lep ratio |                | VAI      |                |
|---------------------|----------------|----------------|----------|----------------|
|                     | <i>r</i>       | <i>P</i> value | <i>r</i> | <i>P</i> value |
| Age                 | -0.22          | 0.000          | 0.01     | 0.886          |
| Sex                 | -0.04          | 0.484          | -0.05    | 0.438          |
| BMI                 | —              | —              | —        | —              |
| Body adiposity      | -0.25          | 0.000          | 0.03     | 0.632          |
| Waist circumference | -0.16          | 0.009          | 0.20     | 0.002          |
| SBP                 | -0.15          | 0.012          | -0.04    | 0.582          |
| DBP                 | -0.35          | 0.001          | 0.03     | 0.680          |
| Glucose             | -0.06          | 0.276          | 0.17     | 0.009          |
| Insulin             | -0.03          | 0.610          | 0.21     | 0.000          |
| HOMA                | -0.04          | 0.506          | 0.27     | 0.000          |
| QUICKI              | 0.13           | 0.034          | -0.30    | 0.000          |
| Triglycerides       | -0.11          | 0.068          | 0.91     | 0.000          |
| Total cholesterol   | -0.15          | 0.011          | 0.30     | 0.000          |
| LDL-cholesterol     | -0.13          | 0.027          | -0.05    | 0.431          |
| HDL-cholesterol     | 0.06           | 0.323          | -0.46    | 0.000          |
| Uric acid           | -0.12          | 0.040          | 0.28     | 0.000          |
| CRP                 | -0.14          | 0.025          | 0.15     | 0.022          |
| Fibrinogen          | -0.15          | 0.067          | 0.05     | 0.606          |
| Homocysteine        | -0.05          | 0.530          | -0.10    | 0.286          |
| WBC                 | -0.19          | 0.033          | 0.13     | 0.142          |
| ALT                 | -0.06          | 0.308          | 0.15     | 0.020          |
| AST                 | -0.02          | 0.740          | 0.11     | 0.081          |
| AST/ALT ratio       | 0.21           | 0.000          | -0.13    | 0.050          |
| γ-GT                | -0.04          | 0.471          | 0.25     | 0.000          |
| Creatinine          | 0.01           | 0.854          | 0.14     | 0.036          |
| SAA                 | -0.15          | 0.056          | 0.05     | 0.554          |

Values are Pearson's correlation coefficients and associated *P* values. CRP concentrations were logarithmically transformed for statistical analysis. Adpn/Lep ratio, Adiponectin/Leptin ratio; VAI, visceral adiposity index; BMI, body mass index; SBP, systolic blood pressure; DBP, diastolic blood pressure; HOMA, homeostatic model assessment; QUICKI, quantitative insulin sensitivity check index; LDL, low-density lipoprotein; HDL, high-density lipoprotein; CRP, C-reactive protein; WBC, white blood cells; ALT, alanine aminotransferase; AST, aspartate aminotransferase; γ-GT, γ-glutamyltransferase; SAA, serum amyloid A. For correlation with gender, male=1 and female=2 was used.
